# Supplementary material for: Electronic health record data analysis on the impact of rescue-triggered inhaled corticosteroids on controller therapy in Black and Latinx individuals from a pragmatic, open-label, patient-level randomised trial
Source: HighWire-hosted journal article supplement (doi:10.1136/bmjopen-2024-088349), 2024-11-01
Supplement: bmjopen-2024-088349supp001_data_supplement.pdf [file bmjopen-2024-088349supp001_data_supplement.pdf]

## **Supplemental Materials**

### *Hierarchy of Controller Step Levels*

- Step 2
  - Low dose ICS
- Step 3
  - Low dose ICS plus Leukotriene inhibitor
  - Medium dose ICS
  - Low dose ICS plus LABA OR LAMA
  - High dose ICS
- Step 4
  - Medium dose ICS plus Leukotriene inhibitor
  - Low dose ICS plus LABA OR LAMA plus Leukotriene inhibitor
  - Low dose ICS plus LABA AND LAMA
  - Low dose ICS plus LABA AND LAMA plus Leukotriene inhibitor
  - High dose ICS plus Leukotriene inhibitor
  - Medium dose ICS plus LABA OR LAMA
  - Medium dose ICS plus LABA OR LAMA plus Leukotriene inhibitor
- Step 5
  - Medium dose ICS plus LABA AND LAMA
  - Medium dose ICS plus LABA AND LAMA plus Leukotriene inhibitor
  - High dose ICS plus LABA OR LAMA
  - High dose ICS plus LABA AND LAMA
  - High dose ICS plus LABA OR LAMA plus Leukotriene inhibitor
  - High dose ICS plus LABA AND LABA plus Leukotriene inhibitor
- Step 6
  - Biologics
  - Daily Corticosteroids

### *Overall Model for All 28 Months (Supplemental Table 1; no corrections applied; no spline)*

The month before or after enrollment did show a significant increase over time (estimate: 0.039;  $t = 9.315$ ). The UCare patients were at a significantly higher asthma controller medication level overall (difference: 0.191;  $t = 2.327$ ). The assigned reclassified levels differed significantly between the sites ( $F(15, 692.810) = 19.968$ ;  $p = 0.000$ ). Five sites (Sites 2, 3, 4, 5, 7) had significantly higher steps of asthma controller medications than patients from Site 16. Two sites (Sites 6, 15) had significantly lower steps of asthma controller medications than patients from Site 16. The assigned reclassified levels differed significantly with the patients' decade of birth ( $F(4, 692.014) = 5.135$ ;  $p = 0.000$ ). Patients born in the 1940s/1950s had significantly higher levels of asthma controller medications than patients born in the 1990s/2000s (difference: 0.611;  $t = 3.803$ ). Lastly, in the months were COVID-19 was not present (before April 2020), the patients had a significantly higher asthma controller medication level than after the COVID-19 pandemic began (difference: 0.902;  $t = 14.118$ ; Supplemental Table 1).

47 Supplemental Table 1. Final LME Results with Significant Variables.

| Parameter                                                                                                                                                                                                                                                                                              | Estimate  | Standard Error | 95% CI         | t      |
|--------------------------------------------------------------------------------------------------------------------------------------------------------------------------------------------------------------------------------------------------------------------------------------------------------|-----------|----------------|----------------|--------|
| -2 Restricted Log Likelihood: 73628.74<br>Month: $F(1, 740.37) = 86.77$ ; $p < 0.001$<br>Group: $F(1, 691.99) = 5.41$ ; $p = 0.02$<br>Site: $F(15, 692.81) = 19.97$ ; $p < 0.001$<br>Decade of Birth: $F(4, 692.01) = 5.14$ ; $p < 0.001$<br>COVID Correction: $F(1, 18759.68) = 199.32$ ; $p < 0.001$ |           |                |                |        |
| Intercept (Baseline)                                                                                                                                                                                                                                                                                   | 0.78      | 0.24           | [0.31, 1.25]   | 3.24*  |
| Month                                                                                                                                                                                                                                                                                                  | 0.04      | 0.00           | [0.03, 0.05]   | 9.32*  |
| UCare                                                                                                                                                                                                                                                                                                  | 0.19      | 0.08           | [0.03, 0.35]   | 2.33*  |
| PARTICS                                                                                                                                                                                                                                                                                                | Reference |                |                |        |
| Site 1                                                                                                                                                                                                                                                                                                 | -0.44     | 0.34           | [-1.11, 0.24]  | -1.27  |
| Site 2                                                                                                                                                                                                                                                                                                 | 1.14      | 0.30           | [0.55, 1.73]   | 3.80*  |
| Site 3                                                                                                                                                                                                                                                                                                 | 1.51      | 0.23           | [1.05, 1.96]   | 6.49*  |
| Site 4                                                                                                                                                                                                                                                                                                 | 0.91      | 0.26           | [0.40, 1.42]   | 3.49*  |
| Site 5                                                                                                                                                                                                                                                                                                 | 1.22      | 0.23           | [0.76, 1.68]   | 5.24*  |
| Site 6                                                                                                                                                                                                                                                                                                 | -0.93     | 0.22           | [-1.36, -0.50] | -4.25* |
| Site 7                                                                                                                                                                                                                                                                                                 | 0.66      | 0.22           | [0.23, 1.08]   | 3.02*  |
| Site 8                                                                                                                                                                                                                                                                                                 | 0.04      | 0.33           | [-0.61, 0.69]  | 0.13   |
| Site 9                                                                                                                                                                                                                                                                                                 | 0.27      | 0.24           | [-0.21, 0.74]  | 1.11   |
| Site 10                                                                                                                                                                                                                                                                                                | 0.05      | 0.23           | [-0.41, 0.50]  | 0.19   |
| Site 11                                                                                                                                                                                                                                                                                                | 0.11      | 0.25           | [-0.38, 0.60]  | 0.43   |
| Site 12                                                                                                                                                                                                                                                                                                | -0.24     | 0.41           | [-1.04, 0.57]  | -0.58  |
| Site 13                                                                                                                                                                                                                                                                                                | -0.07     | 0.23           | [-0.51, 0.37]  | -0.33  |
| Site 14                                                                                                                                                                                                                                                                                                | 0.17      | 0.23           | [-0.27, 0.62]  | 0.78   |
| Site 15                                                                                                                                                                                                                                                                                                | -1.43     | 0.35           | [-2.13, -0.74] | -4.05* |
| Site 16                                                                                                                                                                                                                                                                                                | Reference |                |                |        |
| Born: 1940s & 1950s                                                                                                                                                                                                                                                                                    | 0.61      | 0.16           | [0.30, 0.93]   | 3.80*  |
| Born: 1960s                                                                                                                                                                                                                                                                                            | 0.21      | 0.16           | [-0.11, 0.52]  | 1.29   |
| Born: 1970s                                                                                                                                                                                                                                                                                            | 0.26      | 0.17           | [-0.07, 0.58]  | 1.54   |
| Born: 1980s                                                                                                                                                                                                                                                                                            | 0.31      | 0.17           | [-0.03, 0.65]  | 1.80+  |
| Born: 1990s & 2000s                                                                                                                                                                                                                                                                                    | Reference |                |                |        |
| No COVID-19                                                                                                                                                                                                                                                                                            | 0.90      | 0.06           | [0.78, 1.03]   | 14.19* |
| COVID-19 Present                                                                                                                                                                                                                                                                                       | Reference |                |                |        |

\* p-value &lt; 0.05

50 Supplemental Table 2. LME Results with All Variables

|                                                        |           |      |               |       |
|--------------------------------------------------------|-----------|------|---------------|-------|
| All Variables (-2 Restricted Log Likelihood: 67558.41) |           |      |               |       |
| Month: F(1, 694.89) = 5.31; p = 0.02                   |           |      |               |       |
| Group: F(1, 715.15) = 1.81; p = 0.18                   |           |      |               |       |
| Site: F(15, 721.21) = 18.76; p = 0.00                  |           |      |               |       |
| Gender: F(1, 701.07) = 0.16; p = 0.69                  |           |      |               |       |
| Decade of Birth: F(4, 717.97) = 4.24; p = 0.002        |           |      |               |       |
| Race/Ethnicity: F(1, 739.73) = 0.62; p = 0.43          |           |      |               |       |
| Language: F(1, 695.91) = 2.22; p = 0.14                |           |      |               |       |
| COVID Correction: F(1, 12122.12) = 12.28; p = 0.00     |           |      |               |       |
| Intercept (Baseline)                                   | 4.57      | 1.07 | [2.46, 6.67]  | 4.26* |
| Month                                                  | 0.03      | 0.01 | [0.00, 0.05]  | 2.30* |
| UCare                                                  | 0.41      | 0.30 | [-0.19, 1.00] | 1.35  |
| PARTICS                                                | Reference |      |               |       |
| Site 1                                                 | 1.43      | 1.29 | [-1.10, 3.96] | 1.11  |
| Site 2                                                 | 5.35      | 1.12 | [3.16, 7.53]  | 4.79* |
| Site 3                                                 | 4.43      | 0.87 | [2.72, 6.15]  | 5.08* |
| Site 4                                                 | 2.42      | 1.07 | [0.32, 4.53]  | 2.26* |
| Site 5                                                 | 3.71      | 0.97 | [1.80, 5.61]  | 3.82* |
| Site 6                                                 | -0.74     | 0.85 | [-2.41, 0.93] | -0.87 |
| Site 7                                                 | -0.07     | 0.83 | [-1.69, 1.55] | -0.08 |
| Site 8                                                 | -1.88     | 1.21 | [-4.24, 0.49] | -1.56 |
| Site 9                                                 | 4.93      | 1.02 | [2.93, 6.94]  | 4.82* |
| Site 10                                                | 0.75      | 0.96 | [-1.14, 2.65] | 0.78  |
| Site 11                                                | 3.53      | 1.01 | [1.55, 5.52]  | 3.50* |
| Site 12                                                | 0.30      | 1.55 | [-2.74, 3.33] | 0.19  |
| Site 13                                                | -1.29     | 0.94 | [-3.14, 0.55] | -1.38 |
| Site 14                                                | 6.08      | 0.96 | [4.20, 7.96]  | 6.34* |
| Site 15                                                | -0.75     | 1.43 | [-3.56, 2.06] | -0.53 |
| Site 16                                                | Reference |      |               |       |
| Male                                                   | 0.16      | 0.40 | [-0.63, 0.95] | 0.40  |
| Female                                                 | Reference |      |               |       |
| Born: 1940s & 1950s                                    | 1.77      | 0.60 | [0.60, 2.95]  | 2.97* |
| Born: 1960s                                            | 0.40      | 0.59 | [-0.75, 1.56] | 0.69  |
| Born: 1970s                                            | 0.60      | 0.61 | [-0.61, 1.80] | 0.97  |
| Born: 1980s                                            | 0.20      | 0.63 | [-1.04, 1.45] | 0.32  |
| Born: 1990s & 2000s                                    | Reference |      |               |       |
| Hispanic                                               | -0.37     | 0.47 | [-1.29, 0.55] | -0.79 |
| Non-Hispanic                                           | Reference |      |               |       |
| English                                                | 0.82      | 0.55 | [-0.26, 1.89] | 1.49  |
| Spanish                                                | Reference |      |               |       |
| No COVID-19                                            | 0.59      | 0.17 | [0.26, 0.92]  | 3.51* |
| COVID-19 Present                                       | Reference |      |               |       |

51  
52  
53
